# Supplementary material for: Occurrence of novel human tomato brown rugose fruit virus and conventional microbial source tracking genetic markers in a Hawaiian coupled stream-beach system
Source: Royal Society of Chemistry journal article supplement (doi:10.1039/d5em00373c), 2025-12-02
Supplement: d5em00373c1.pdf [file d5em00373c1.pdf]

**Supplementary Information for**

**Occurrence of Novel Human Tomato Brown Rugose Fruit Virus and Conventional  
Microbial Source Tracking Genetic Markers in a Hawaiian Coupled Stream-Beach System**

Sarah A. Lowry<sup>1</sup>, Adam Diedrich<sup>2</sup>, Ella Lum<sup>3</sup>, Orin C. Shanks<sup>2</sup>, and Alexandria B. Boehm<sup>1\*</sup>

<sup>1</sup> Department of Civil and Environmental Engineering, Stanford University, 473 Via Ortega, Stanford, CA 94305, USA

<sup>2</sup> U.S. Environmental Protection Agency, Office of Research and Development, Cincinnati, OH, United States of America

<sup>3</sup> Punahou School, 1601 Punahou St, Honolulu, HI 96822

\* Corresponding author: [aboehm@stanford.edu](mailto:aboehm@stanford.edu)

**qPCR and dPCR information.** Thermocycling conditions for the qPCR assays (HF183/BacR287, CPQ\_056, GFD, DG3, and Sketa22) were as follows: 10 min at 95°C followed by 40 cycles of 15 s at 95°C and 1 min at 60°C. Thermocycling conditions for the dPCR assays (ToBRFV, BCoV) were as follows: 50°C for 40 min, 95°C for 2 min, followed by 40 cycles of 94°C for 5 s and 55°C for 30 s.

The equivalent sample volume analyzed for qPCR assays was 4 mL sample (2 µL template from 100 µL eluent). The equivalent sample volume analyzed for dPCR assays was 60 mL sample (15 µL template in two pooled wells from 100 µL eluent). The dPCR mean partition volume was 0.7 nL. The mean dPCR partitions measured were 50869.7 partitions (variance 6192 partitions). The mean dPCR target copies per partition was 0.00011 target copies per partition (variance  $1.64 \times 10^{-7}$  target copies per partition).

**Exclusion of GFD in logistic regression analysis.** For GFD, quasi-perfect separation was observed with salinity and enterococci concentration, as the GFD marker was detected in all samples at Sites A and B (i.e., for all salinity values lower than 33.8 ppt and all enterococci concentrations >10 MPN/100mL, GFD was detected). Because these variables almost perfectly predict the detection of GFD, logistic regression is not a suitable method for the analysis of the data.

**BCoV as an RNA processing control.** BCoV was used as an RNA control in this study with acceptance criteria of falling between 0.1x to 10x of the mean method blank BCoV concentration for each batch. A downward concentration trend over time and difference between batch preparations were observed, suggesting that stock degradation may be occurring during storage at 4°C between uses (Figure S7). Conversely, no decay or difference across batches in the study was observed for the DNA control Sketa22 (Figure S8), suggesting that it is a more stable control. Future work should focus on identifying an RNA control with similar performance and stability as Sketa22.

## Tables

**Table S1.** Primer and probe sequence information for selected assays.

| Assay             | Sequence (5' to 3')                                                                                                   | Reference |
|-------------------|-----------------------------------------------------------------------------------------------------------------------|-----------|
| HF183/B<br>acR287 | F: ATCATGAGTTCACATGTCCG<br>R: CTTCTCTCAGAACCCCTATCC<br>P: FAM-CTAATGGAACGCATCCC-MGB<br>IAC: VIC-AACACGCCGTTGCTACA-MGB | 1         |
| CPQ_056           | F: CAGAAGTACAACTCCTAAAAACGTAGAG<br>R: GATGACCAATAACAAGCCATTAGC<br>P: FAM-AATAACGATTTACGTGATGTAAC-MGB                  | 2         |
| ToBRFV            | F: TCAGTGTCTGTTTGGTCGATAA<br>R: GGAACGACTTTGAACTGAAACC<br>P: FAM-AGAGCGGACGAGGCAACTCCTG-ZEN/IBHQ                      | 3         |
| GFD               | F: TCGGCTGAGCACTCTAGGG<br>R: GCGTCTCTTTGTACATCCCA<br>P: FAM-ACGTCAAGTCATCATGGCCCTTACGC-ZEN/IBHQ                       | 4,5       |
| DG3               | F: TTTTCAGCCCCGTTGTTTCG<br>R: TGAGCGGGCATGGTCATATT<br>P: FAM-AGTCTACGCGGGCGTACT-MGB                                   | 6         |
| Sketa22           | F: GGTTTCCGCAGCTGGG<br>R: CCGAGCCGTCCTGGTC<br>P: FAM-AGTCGCAGGCGGCCACCGT-TAMRA                                        | 1         |
| BCoV              | F: CTGGAAGTTGGTGGAGTT<br>R: ATTATCGGCCTAACATACATC<br>P: FAM-CCTTCATATCTATACACATCAAGTTGTT-BHQ1                         | 7         |

**Table S2.** Temporal sampling campaign univariate analysis results used to screen correlations for inclusion into logistic regression analysis. Variables with correlations with p-values less than 0.25 are bolded and were included in the logistic regression analysis.

| <b>MST Marker</b> | <b>Variable Tested</b> | <b>P-Value for Correlation</b> |
|-------------------|------------------------|--------------------------------|
| ToBRFV            | Enterococci            | 0.49                           |
| ToBRFV            | Tidal Stage            | 0.34                           |
| ToBRFV            | Temperature            | 0.99                           |
| ToBRFV            | Salinity               | 0.82                           |
| <b>ToBRFV</b>     | <b>Location</b>        | <b>0.098</b>                   |
| <b>ToBRFV</b>     | <b>Time</b>            | <b>0.11</b>                    |
| <b>ToBRFV</b>     | <b>Rainfall</b>        | <b>0.012</b>                   |
| <b>DG3</b>        | <b>Enterococci</b>     | <b>0.23</b>                    |
| <b>DG3</b>        | <b>Tidal Stage</b>     | <b>0.15</b>                    |
| <b>DG3</b>        | <b>Temperature</b>     | <b>0.19</b>                    |
| <b>DG3</b>        | <b>Salinity</b>        | <b>0.03</b>                    |
| DG3               | Location               | 0.99                           |
| DG3               | Time                   | 0.46                           |
| DG3               | Rainfall               | 1.00                           |

**Table S3.** Results of multivariable logistic regression model for ToBRFV and DG3 detection. P-values adjusted in each family (ToBRFV, DG3) of tests using the Benjamini-Hochberg (BH) correction. \* indicates a significant result.

| ToBRFV                          |                  |                |               |                  |
|---------------------------------|------------------|----------------|---------------|------------------|
| Term                            | $\beta$ Estimate | Standard Error | P-value       | Adjusted P-value |
| Intercept                       | -0.97            | 0.57           | 0.090         | N/A              |
| Site: B                         | 1.11             | 0.63           | 0.076         | 0.10             |
| Site: C                         | -0.42            | 0.65           | 0.52          | 0.52             |
| Time: Morning                   | -1.04            | 0.53           | 0.051         | 0.10             |
| <b>Rainfall in previous day</b> | <b>1.49</b>      | <b>0.54</b>    | <b>0.0062</b> | <b>0.025*</b>    |
| DG3                             |                  |                |               |                  |
| Term                            | $\beta$ Estimate | Standard Error | P-value       | Adjusted P-Value |
| Intercept                       | -0.86            | 6.28           | 0.65          | N/A              |
| Enterococci concentration       | <-0.001          | 0.002          | 0.41          | 0.41             |
| Water temperature               | -0.0026          | 0.27           | 0.41          | 0.41             |
| Salinity                        | -0.096           | 0.053          | 0.27          | 0.41             |
| Flood Tidal Stage               | 2.66             | 1.75           | 0.13          | 0.41             |
| Transitional Tidal Stage        | 1.92             | 1.5            | 0.20          | 0.41             |

**Table S4.** Results from random grab samples taken throughout the sampling campaign at sites of interest. Positive MST marker detections are bolded and highlighted in red.

| Sample | Enterococci | HF183/Ba | CPQ_056 | ToBRFV | DG3 | GFD |
|--------|-------------|----------|---------|--------|-----|-----|
|--------|-------------|----------|---------|--------|-----|-----|

|          | <b>concentration<br/>(MPN/100mL)</b> | <b>cR287</b>  | <b>crAsspha<br/>ge-like</b> |               |           |               |
|----------|--------------------------------------|---------------|-----------------------------|---------------|-----------|---------------|
| Stream 1 | 41                                   | Nondetect     | Nondetect                   | <b>Detect</b> | Nondetect | <b>Detect</b> |
| Stream 2 | 41                                   | Nondetect     | Nondetect                   | Nondetect     | Nondetect | <b>Detect</b> |
| Stream 3 | 216                                  | <b>Detect</b> | <b>Detect</b>               | <b>Detect</b> | Nondetect | <b>Detect</b> |
| Outfall  | <10                                  | Nondetect     | Nondetect                   | Nondetect     | Nondetect | Nondetect     |
| Seaweed  | <10                                  | Nondetect     | Nondetect                   | Nondetect     | Nondetect | Nondetect     |

## Figures

| Study Description                                                                                                                                                                                                                                                                                                                                                                                                                                                                                                                                                       | Environmental Sampling              | Sample Treatment                                                                                          | Sample Reduction                    | Nucleic-acid Extraction                                       | Reverse Transcription                                                                                    | PCR Amplification                                                          | Analysis                            |
|-------------------------------------------------------------------------------------------------------------------------------------------------------------------------------------------------------------------------------------------------------------------------------------------------------------------------------------------------------------------------------------------------------------------------------------------------------------------------------------------------------------------------------------------------------------------------|-------------------------------------|-----------------------------------------------------------------------------------------------------------|-------------------------------------|---------------------------------------------------------------|----------------------------------------------------------------------------------------------------------|----------------------------------------------------------------------------|-------------------------------------|
| Detection of Microbial Source Tracking Markers in Hawaiian Recreational Waters<br>Date: 3/11/2025<br>Completed by Sarah Lowry                                                                                                                                                                                                                                                                                                                                                                                                                                           | Notes: Described in methods         | Notes: Described in methods, treated filters with 50mM MgCl2 and 0.5mL of RNAlater Stabilization Solution | Notes: N/A                          | Notes: Described in methods                                   | Notes: Described in methods, used one-step RT-dPCR with the QIAGEN OneStep Advanced Probe Master Mix kit | Notes: Described in methods and SI, used qPCR and dPCR to measure targets. | Notes: Described in methods         |
|                                                                                                                                                                                                                                                                                                                                                                                                                                                                                                                                                                         |                                     |                                                                                                           |                                     |                                                               |                                                                                                          |                                                                            |                                     |
| Control Checklist                                                                                                                                                                                                                                                                                                                                                                                                                                                                                                                                                       | Environmental Sampling              | Sample Treatment                                                                                          | Sample Reduction                    | Nucleic-acid Extraction                                       | Reverse Transcription                                                                                    | PCR Amplification                                                          |                                     |
| Step performed                                                                                                                                                                                                                                                                                                                                                                                                                                                                                                                                                          | <input checked="" type="checkbox"/> | <input checked="" type="checkbox"/>                                                                       | <input type="checkbox"/>            | <input checked="" type="checkbox"/>                           | <input checked="" type="checkbox"/>                                                                      | <input checked="" type="checkbox"/>                                        |                                     |
| Step has control info                                                                                                                                                                                                                                                                                                                                                                                                                                                                                                                                                   | <input checked="" type="checkbox"/> | <input type="checkbox"/>                                                                                  | <input type="checkbox"/>            | <input checked="" type="checkbox"/>                           | <input checked="" type="checkbox"/>                                                                      | <input checked="" type="checkbox"/>                                        |                                     |
| # of control replicates                                                                                                                                                                                                                                                                                                                                                                                                                                                                                                                                                 | 1 daily field blank                 |                                                                                                           |                                     | qPCR 9 per plate                                              | dPCR 2 per plate                                                                                         | dPCR 1 per plate, qPCR 6 per plate                                         | Negative controls                   |
| Control result reported                                                                                                                                                                                                                                                                                                                                                                                                                                                                                                                                                 | <input checked="" type="checkbox"/> | <input type="checkbox"/>                                                                                  | <input type="checkbox"/>            | <input checked="" type="checkbox"/>                           | <input checked="" type="checkbox"/>                                                                      | <input checked="" type="checkbox"/>                                        |                                     |
| Method for handling failed controls described                                                                                                                                                                                                                                                                                                                                                                                                                                                                                                                           | <input type="checkbox"/>            | <input type="checkbox"/>                                                                                  | <input type="checkbox"/>            | <input type="checkbox"/>                                      | <input type="checkbox"/>                                                                                 | <input type="checkbox"/>                                                   |                                     |
| Step has control info                                                                                                                                                                                                                                                                                                                                                                                                                                                                                                                                                   | <input type="checkbox"/>            | <input type="checkbox"/>                                                                                  | <input type="checkbox"/>            | <input checked="" type="checkbox"/>                           | <input checked="" type="checkbox"/>                                                                      | <input checked="" type="checkbox"/>                                        | Positive controls                   |
| Control identity described                                                                                                                                                                                                                                                                                                                                                                                                                                                                                                                                              | <input type="checkbox"/>            | <input type="checkbox"/>                                                                                  | <input type="checkbox"/>            | <input checked="" type="checkbox"/>                           | <input checked="" type="checkbox"/>                                                                      | <input checked="" type="checkbox"/>                                        |                                     |
| Control quantification method described                                                                                                                                                                                                                                                                                                                                                                                                                                                                                                                                 | <input type="checkbox"/>            | <input type="checkbox"/>                                                                                  | <input type="checkbox"/>            | <input checked="" type="checkbox"/>                           | <input checked="" type="checkbox"/>                                                                      | <input checked="" type="checkbox"/>                                        |                                     |
| # control replicates                                                                                                                                                                                                                                                                                                                                                                                                                                                                                                                                                    |                                     |                                                                                                           |                                     | qPCR Sketa22 tested in every sample                           | dPCR BCoV tested in every sample                                                                         | dPCR 1 per plate, qPCR 6 per plate                                         |                                     |
| Control result reported                                                                                                                                                                                                                                                                                                                                                                                                                                                                                                                                                 | <input type="checkbox"/>            | <input type="checkbox"/>                                                                                  | <input type="checkbox"/>            | <input checked="" type="checkbox"/>                           | <input checked="" type="checkbox"/>                                                                      | <input checked="" type="checkbox"/>                                        |                                     |
| Method for handling failed controls described                                                                                                                                                                                                                                                                                                                                                                                                                                                                                                                           | <input type="checkbox"/>            | <input type="checkbox"/>                                                                                  | <input type="checkbox"/>            | <input type="checkbox"/>                                      | <input type="checkbox"/>                                                                                 | <input type="checkbox"/>                                                   |                                     |
|                                                                                                                                                                                                                                                                                                                                                                                                                                                                                                                                                                         |                                     |                                                                                                           |                                     |                                                               |                                                                                                          |                                                                            |                                     |
| Process checklist                                                                                                                                                                                                                                                                                                                                                                                                                                                                                                                                                       |                                     |                                                                                                           |                                     |                                                               |                                                                                                          |                                                                            |                                     |
| Environmental Sampling                                                                                                                                                                                                                                                                                                                                                                                                                                                                                                                                                  | <input checked="" type="checkbox"/> | Nucleic-acid Extraction                                                                                   | <input checked="" type="checkbox"/> | qPCR or dPCR                                                  | <input checked="" type="checkbox"/>                                                                      | Analysis- dPCR                                                             | <input checked="" type="checkbox"/> |
| Sample procedure                                                                                                                                                                                                                                                                                                                                                                                                                                                                                                                                                        | <input checked="" type="checkbox"/> | Extraction procedure                                                                                      | <input checked="" type="checkbox"/> | Target gene name, amplicon length                             | <input checked="" type="checkbox"/>                                                                      | Threshold settings                                                         | <input checked="" type="checkbox"/> |
| Number of samples                                                                                                                                                                                                                                                                                                                                                                                                                                                                                                                                                       | <input checked="" type="checkbox"/> | Volume or mass extracted, volume or mass obtained                                                         | <input checked="" type="checkbox"/> | Thermocycling temp and times                                  | <input checked="" type="checkbox"/>                                                                      | Technical replicates, number, well merging                                 | <input checked="" type="checkbox"/> |
| Sample amount, mean, range                                                                                                                                                                                                                                                                                                                                                                                                                                                                                                                                              | <input checked="" type="checkbox"/> | Extract storage conditions                                                                                | <input checked="" type="checkbox"/> | Master mix composition: vendors, concentrations               | <input checked="" type="checkbox"/>                                                                      | Partitions measured, number, mean, variance                                | <input checked="" type="checkbox"/> |
| Sampling locations, dates, times                                                                                                                                                                                                                                                                                                                                                                                                                                                                                                                                        | <input checked="" type="checkbox"/> | Reverse Transcription                                                                                     |                                     | Additives: vendors, composition                               | <input checked="" type="checkbox"/>                                                                      | Partition volume                                                           | <input checked="" type="checkbox"/> |
| Sample storage conditions                                                                                                                                                                                                                                                                                                                                                                                                                                                                                                                                               | <input checked="" type="checkbox"/> | One- or two-step                                                                                          | <input checked="" type="checkbox"/> | Template amount added, pre-treatment (if any)                 | <input checked="" type="checkbox"/>                                                                      | Target copies per partition, mean, variance                                | <input checked="" type="checkbox"/> |
| Sample Treatment                                                                                                                                                                                                                                                                                                                                                                                                                                                                                                                                                        |                                     | cDNA storage conditions (if 2 step)                                                                       | <input type="checkbox"/>            | Primers: sequences, concentrations, vendors, references       | <input checked="" type="checkbox"/>                                                                      | Program used for dPCR analysis                                             | <input checked="" type="checkbox"/> |
| Treatment procedure                                                                                                                                                                                                                                                                                                                                                                                                                                                                                                                                                     | <input checked="" type="checkbox"/> | Reaction temperatures and times                                                                           | <input checked="" type="checkbox"/> | Amplicon confirmation method (probe, melt curve details, etc) | <input type="checkbox"/>                                                                                 | Explanation of control results, example plots                              | <input checked="" type="checkbox"/> |
| Reagents                                                                                                                                                                                                                                                                                                                                                                                                                                                                                                                                                                | <input checked="" type="checkbox"/> | Reaction reagents and concentrations                                                                      | <input checked="" type="checkbox"/> | Probe sequence, concentration, vendor, reference              | <input checked="" type="checkbox"/>                                                                      | Analysis- qPCR                                                             |                                     |
| Sample Reduction                                                                                                                                                                                                                                                                                                                                                                                                                                                                                                                                                        |                                     | Priming method                                                                                            | <input type="checkbox"/>            | Instrumentation                                               | <input checked="" type="checkbox"/>                                                                      | Technical replicates, number, calculations                                 | <input checked="" type="checkbox"/> |
| Reduction procedure                                                                                                                                                                                                                                                                                                                                                                                                                                                                                                                                                     | <input type="checkbox"/>            | Reaction volume, added template amount                                                                    | <input type="checkbox"/>            | Inhibition assessment procedure                               | <input checked="" type="checkbox"/>                                                                      | Calibration standards, description, source                                 | <input checked="" type="checkbox"/> |
| Reagents                                                                                                                                                                                                                                                                                                                                                                                                                                                                                                                                                                | <input type="checkbox"/>            | RT efficiency assessment procedure (if 2-step)                                                            | <input type="checkbox"/>            | Inhibition control description (if used)                      | <input checked="" type="checkbox"/>                                                                      | Method of quantifying standards                                            | <input checked="" type="checkbox"/> |
| Concentration factor                                                                                                                                                                                                                                                                                                                                                                                                                                                                                                                                                    | <input type="checkbox"/>            | RT control description (if two-step)                                                                      | <input type="checkbox"/>            | Number of samples tested and found inhibited                  | <input checked="" type="checkbox"/>                                                                      | Calibration curve slope                                                    | <input checked="" type="checkbox"/> |
|                                                                                                                                                                                                                                                                                                                                                                                                                                                                                                                                                                         |                                     | RT efficiency reported (if 2-step)                                                                        | <input type="checkbox"/>            | Equivalent volume of sample analyzed                          | <input checked="" type="checkbox"/>                                                                      | Calibration curve R2                                                       | <input checked="" type="checkbox"/> |
|                                                                                                                                                                                                                                                                                                                                                                                                                                                                                                                                                                         |                                     |                                                                                                           |                                     |                                                               |                                                                                                          | Lowest standard measured or 95% LOD                                        | <input checked="" type="checkbox"/> |
|                                                                                                                                                                                                                                                                                                                                                                                                                                                                                                                                                                         |                                     |                                                                                                           |                                     |                                                               |                                                                                                          | Cq value determination methods                                             | <input checked="" type="checkbox"/> |
| <p>Note to users: This checklist is provided as guidance for best practices for reporting, but is not meant to be prescriptive. Not all items in the check list will apply to all studies. Please see Borchardt et al. The Environmental Microbiology Minimum Information (EMMI) Guidelines: qPCR and dPCR Quality and Reporting for Environmental Microbiology. Environmental Science &amp; Technology, 2021, 55, 15, 10210–10223.</p> <p>Version 3.0<br/>This version maintained by Borchardt, Boehm, Salit, Noble, Wiggington, Spencer<br/>Date: 18 October 2023</p> |                                     |                                                                                                           |                                     |                                                               |                                                                                                          |                                                                            |                                     |

**Figure S1.** Completed Environmental Microbiology Minimum Information (EMMI) guidelines from Borchardt et al. 2021.<sup>8</sup>

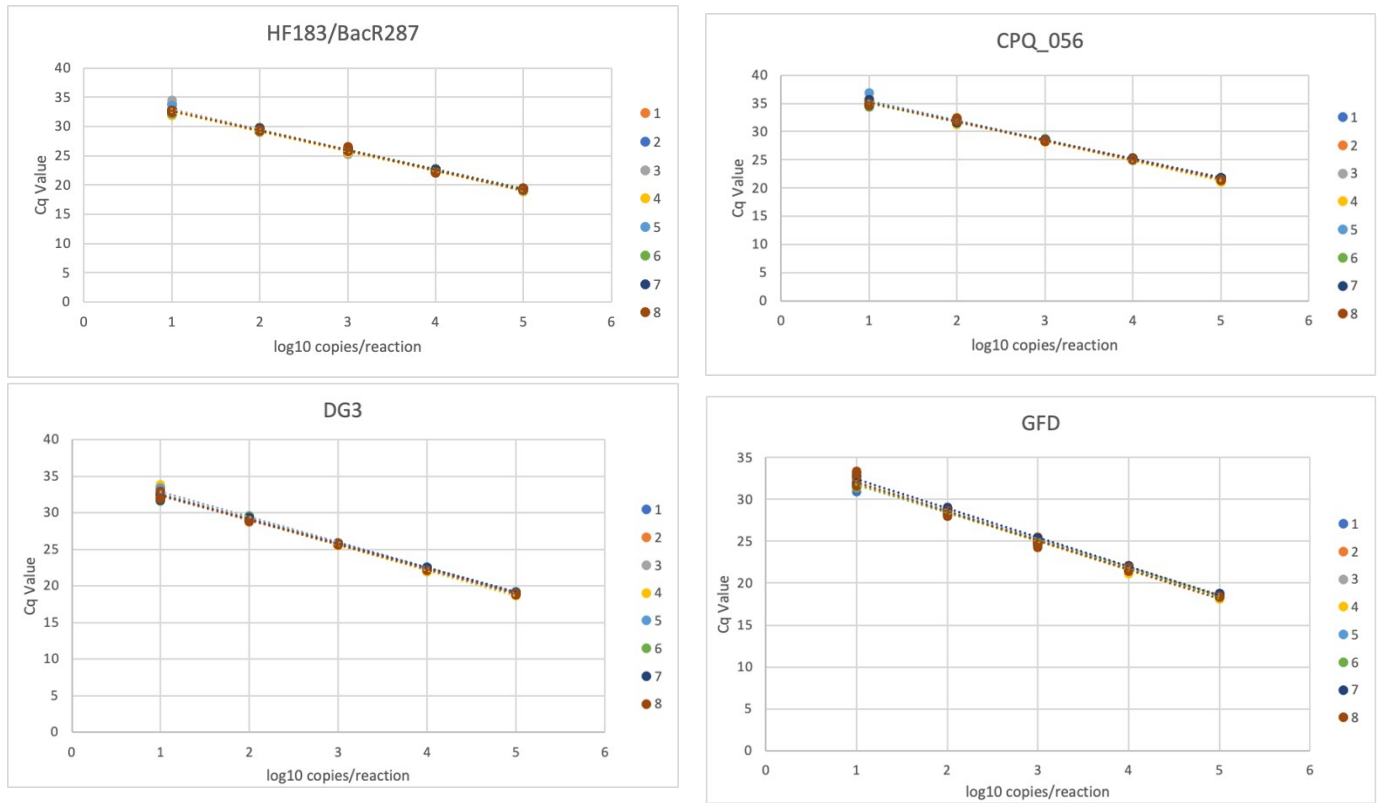

**Figure S2.** Standard curves for HF183/BacR287, CPQ\_056 (crAssphage), DG3, and GFD assays. Eight standard curves produced for each assay. Slope generated from all standard curves, y-intercept generated for each batch using the batch-specific y-intercept control.



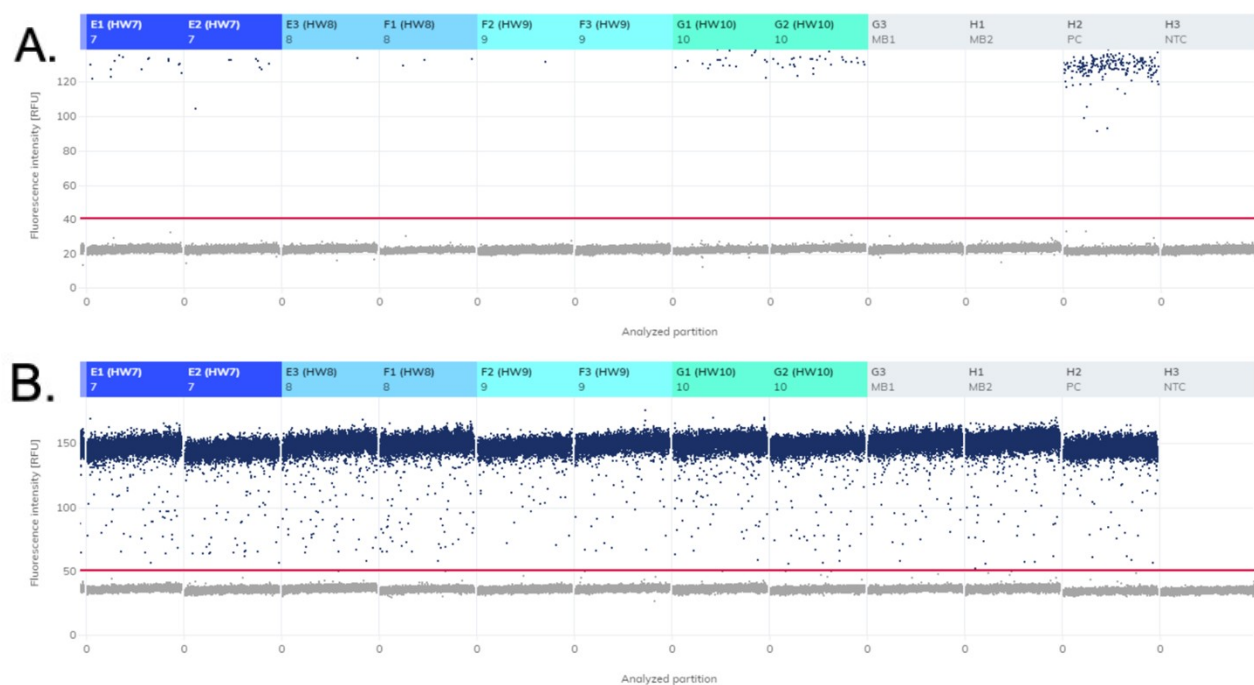

**Figure S3.** (A) Example thresholding for ToBRFV partition data. Threshold was set at 40 RFU across all instrument runs from precision profile testing. (B) Example thresholding for BCoV partition data. Threshold was set at 50 RFU across all instrument runs from precision profile testing.

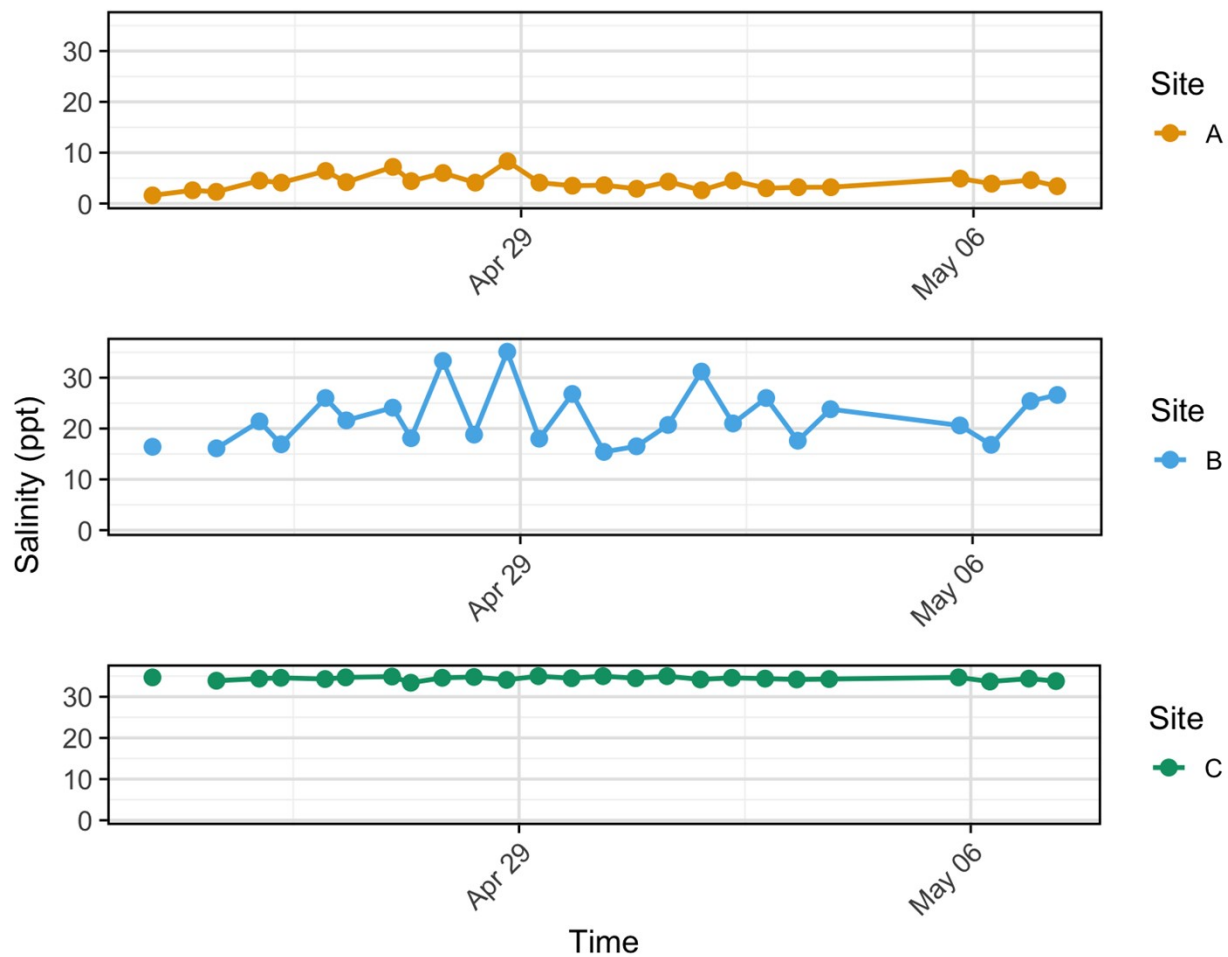

**Figure S4.** Salinity measurements in ppt over time for each sample in the temporal sampling campaign stratified by site. Two samples (B4-23E and C4-23E) are missing salinity data because of instrument malfunction, shown by a gap in the line.

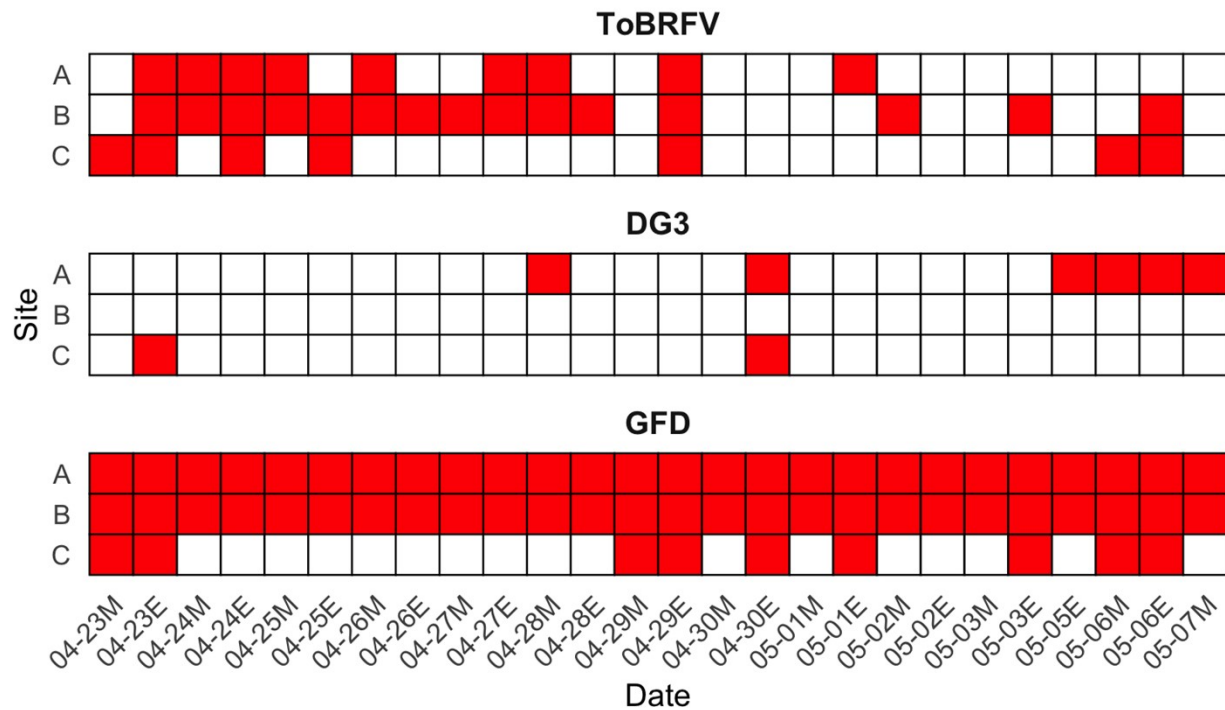

**Figure S5.** Heatmap of three MST markers across sites and dates of the sampling campaign. Detects are shown in red and non-detects are shown in white. The letter on the end of the date refers to the time of day the sample was collected, with M representing “morning” and E representing “evening”. Site is shown on the x-axis, with A representing the most upstream site (marsh), B representing the stream site, and C representing the beach site.

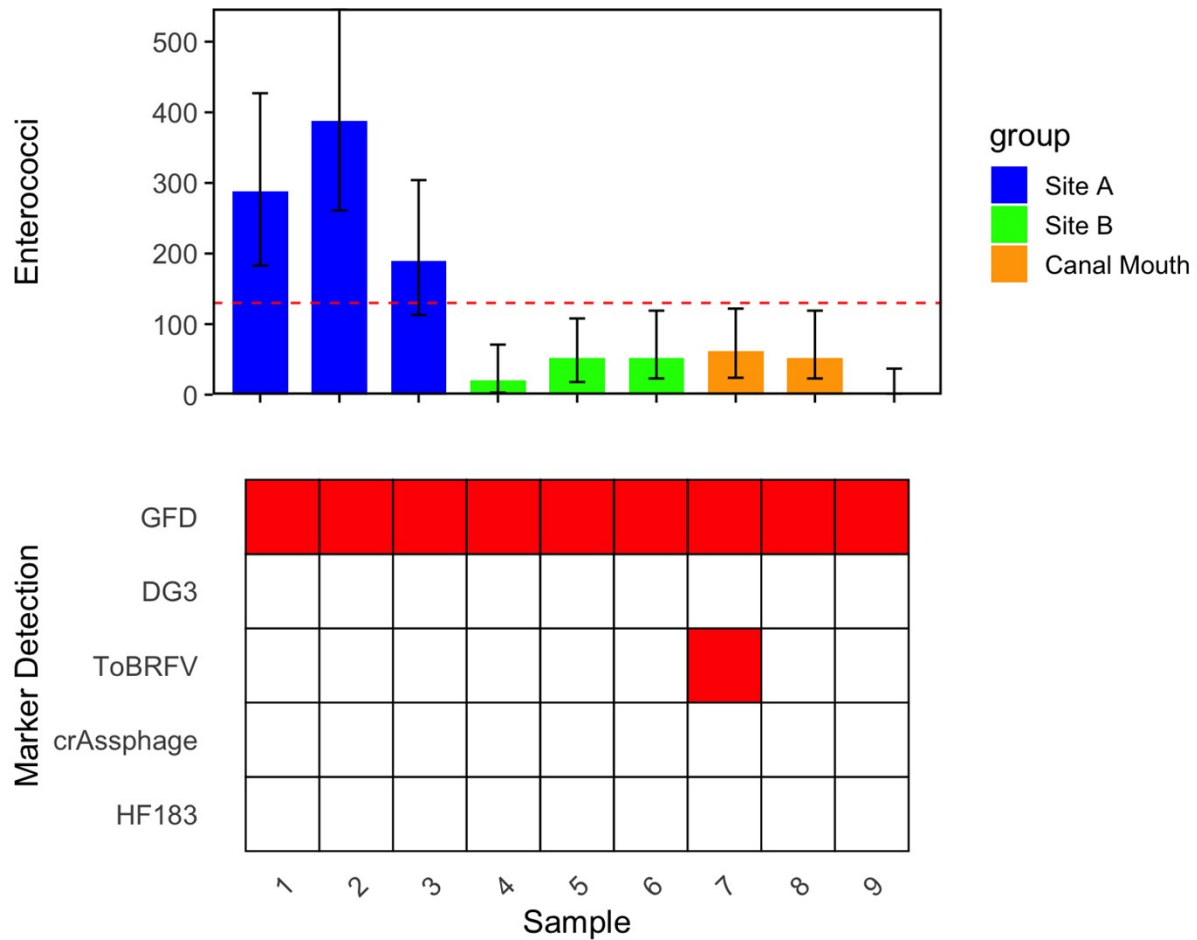

**Figure S6.** Results from lateral spatial sampling campaign, where samples 1, 2, and 3 were taken across the canal at Site A, samples 4, 5, and 6 were taken across the canal at Site B, and samples 7, 8, and 9 were taken across the canal at the mouth of the canal. The top graph shows enterococci concentration (MPN/100 mL) for each group of lateral samples with error bars representing lower and upper 95% confidence limits, and the bottom heat maps shows the detection of MST markers for each sample.

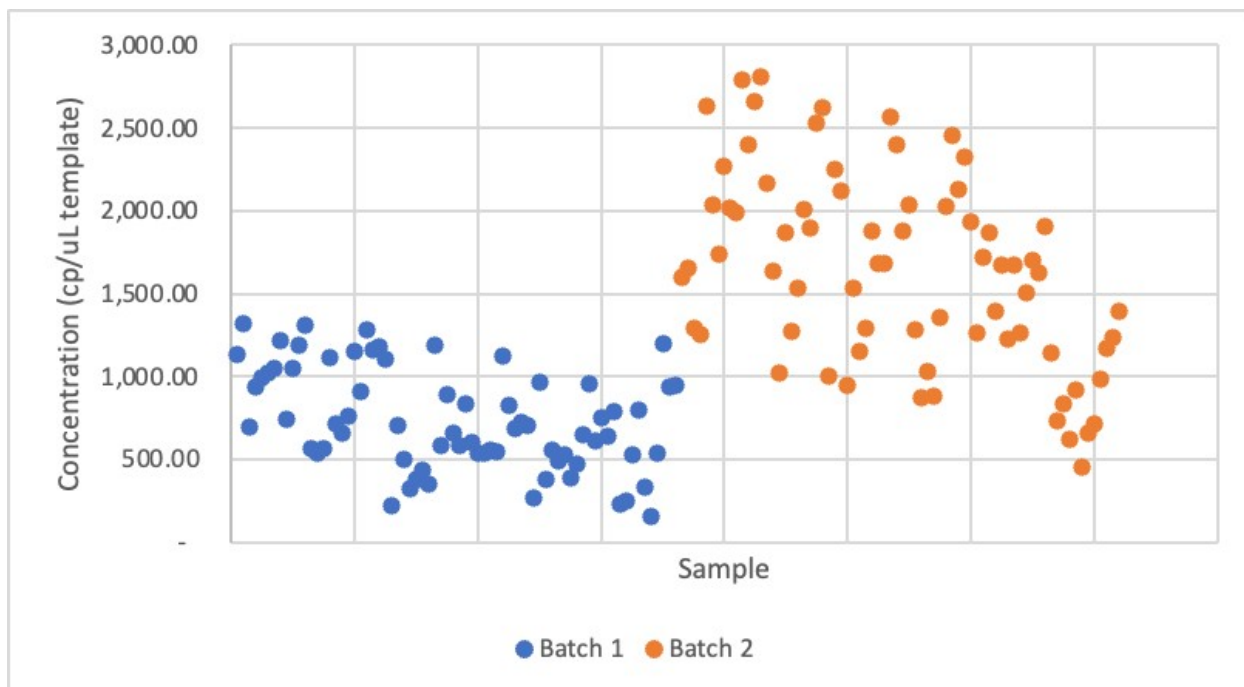

**Figure S7.** BCoV concentrations (cp/μL template) measured in each sample over the course of the study. Downward trend over time and difference in batches used was observed, suggesting that decay may be occurring while BCoV control was stored in the fridge.

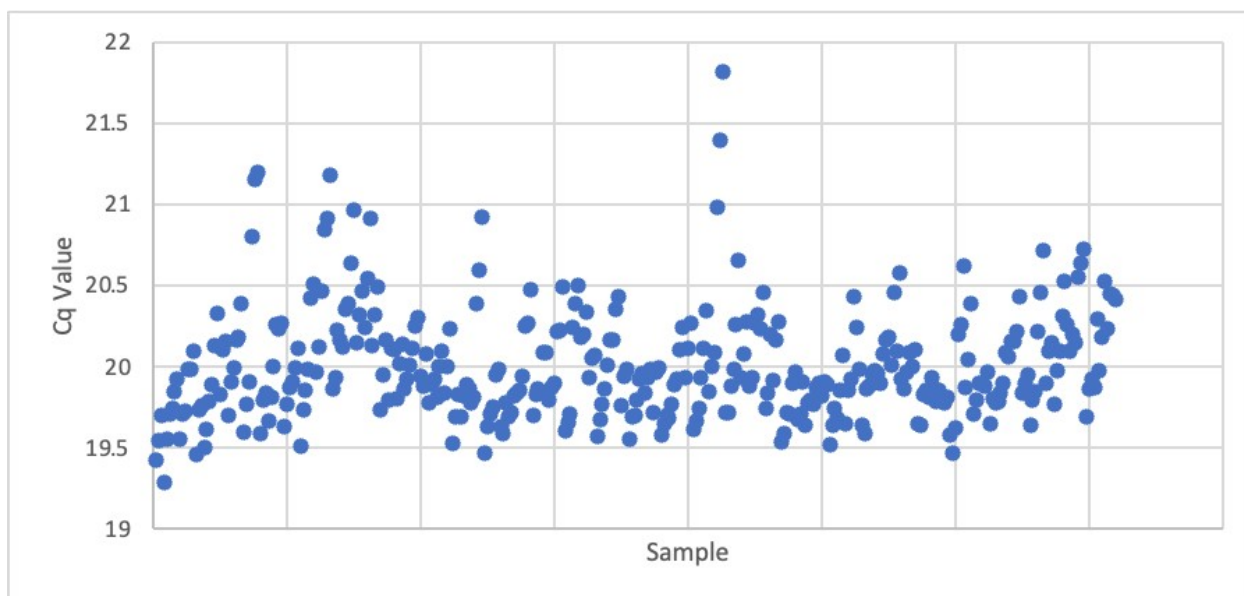

**Figure S8.** Sketa22 Cq values measured in each sample over the course of the study. No downward trend or difference in batches was observed, and sample Cq values are tightly clustered.

## References

1. USEPA. Method 1696.1: Characterization of human fecal pollution in water by HF183/BacR287 TaqMan quantitative polymerase chain reaction (qPCR) assay. United States Environmental Protection Agency; 2021.
2. Stachler E, Kelty C, Sivaganesan M, Li X, Bibby K, Shanks OC. Quantitative CrAssphage PCR Assays for Human Fecal Pollution Measurement. *Environ Sci Technol*. 2017 Aug 15;51(16):9146–54.
3. Natarajan A, Fremin BJ, Schmidtke DT, Wolfe MK, Zlitni S, Graham KE, et al. The Tomato Brown Rugose Fruit Virus Movement Protein Gene Is a Novel Microbial Source Tracking Marker. *Applied and Environmental Microbiology*. 2023 July 5;89(7):e00583-23.
4. Green HC, Dick LK, Gilpin B, Samadpour M, Field KG. Genetic Markers for Rapid PCR-Based Identification of Gull, Canada Goose, Duck, and Chicken Fecal Contamination in Water. *Applied and Environmental Microbiology*. 2012 Jan 15;78(2):503–10.
5. Weller D, Belias A, Green H, Roof S, Wiedmann M. Landscape, Water Quality, and Weather Factors Associated With an Increased Likelihood of Foodborne Pathogen Contamination of New York Streams Used to Source Water for Produce Production. *Front Sustain Food Syst* [Internet]. 2020 Feb 6 [cited 2025 Apr 16];3. Available from: <https://www.frontiersin.orghttps://www.frontiersin.org/journals/sustainable-food-systems/articles/10.3389/fsufs.2019.00124/full>
6. Green HC, White KM, Kelty CA, Shanks OC. Development of Rapid Canine Fecal Source Identification PCR-Based Assays. *Environ Sci Technol*. 2014 Oct 7;48(19):11453–61.
7. Decaro N, Elia G, Campolo M, Desario C, Mari V, Radogna A, et al. Detection of bovine coronavirus using a TaqMan-based real-time RT-PCR assay. *Journal of Virological Methods*. 2008 Aug 1;151(2):167–71.
8. Borchardt MA, Boehm AB, Salit M, Spencer SK, Wigginton KR, Noble RT. The Environmental Microbiology Minimum Information (EMMI) Guidelines: qPCR and dPCR Quality and Reporting for Environmental Microbiology. *Environ Sci Technol*. 2021 Aug 3;55(15):10210–23.
